# Supplementary material for: Study on the interactions between melamine-cored Schiff bases with cucurbit[ n ]urils of different sizes and its application in detecting silver ions
Source: publisher site journal article supplement (doi:10.3762/bjoc.17.204), 2021-12-17
Supplement: Additional file 1 [file 1860-5397-17-204-S1.pdf]

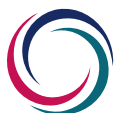

## Supporting Information

for

### **Study on the interactions between melamine-cored Schiff bases with cucurbit[*n*]urils of different sizes and its application in detecting silver ions**

Jun-Xian Gou, Yang Luo, Xi-Nan Yang, Wei Zhang, Ji-Hong Lu, Zhu Tao and Xin Xiao

*Beilstein J. Org. Chem.* **2021**, *17*, 2950–2958. [doi:10.3762/bjoc.17.204](https://doi.org/10.3762/bjoc.17.204)

## Experimental and analytical data

# Content

|                                                                                                                                                                                     |     |
|-------------------------------------------------------------------------------------------------------------------------------------------------------------------------------------|-----|
| Materials .....                                                                                                                                                                     | S3  |
| Measurement of UV–vis spectra.....                                                                                                                                                  | S3  |
| <sup>1</sup> H NMR measurements .....                                                                                                                                               | S3  |
| Isothermal titration calorimetry (ITC) measurements.....                                                                                                                            | S3  |
| Measurement of the limit of detection .....                                                                                                                                         | S4  |
| The experimental method of anti-interference experiment .....                                                                                                                       | S4  |
| Scheme S1 The synthesis routes of TBT.....                                                                                                                                          | S5  |
| Figure S1 The <sup>1</sup> H NMR of <b>1</b> .....                                                                                                                                  | S5  |
| Figure S2 COSY of <b>1</b> .....                                                                                                                                                    | S6  |
| Figure S3 The <sup>1</sup> H NMR of <b>2</b> .....                                                                                                                                  | S6  |
| Figure S4 The <sup>1</sup> H NMR and COSY of <b>TBT</b> .....                                                                                                                       | S7  |
| Figure S5 The UV–vis of TBT (20 μM) towards TMeQ[6].....                                                                                                                            | S8  |
| Figure S6 The plot of $N_{\text{TMeQ[6]}}/N_{\text{TBT}}$ vs. abs. at $\lambda = 286\text{nm}$ .....                                                                                | S8  |
| Figure S7 ITC of Q[7] (0.1 M) towards TBT(0.005 M). .....                                                                                                                           | S9  |
| Table S1 Date of ITC .....                                                                                                                                                          | S9  |
| Figure S8 The <sup>1</sup> H NMR titration of TBT (1 mM) with an increasing amount of Q[8] from 0, 0.5, 1.0 to 2.0 from bottom to top, and free Q[8] (top) in D <sub>2</sub> O..... | S10 |
| Figure S9 The plot of $N_{\text{Q[8]}}/N_{\text{TBT}}$ vs abs. at $\lambda = 286\text{nm}$ .....                                                                                    | S10 |
| Figure S10 The SEM of Q[8]-TBT (1 mM).....                                                                                                                                          | S11 |
| Figure S11 The plot of $N_{\text{Ag}^+}/N_{\text{Q[7]-TBT}}$ vs. abs. at $\lambda = 286\text{nm}$ .....                                                                             | S11 |

## **Materials**

Q[7], Q[7] and TMeQ[6] were synthesized according to a procedure developed previously in our laboratory. Melamine, 4-hydroxybenzaldehyde,  $K_2CO_3$  and ethyl 4-bromobutyrate were obtained from Sigma-Aldrich (Shanghai, China) and corresponding perchlorate salts were obtained from Aladdin (Shanghai, China). All reagents were of analytical reagent grade and were used without further purification. Doubly-distilled water was used throughout.

## **Measurement of UV–vis spectra**

All UV-visible spectra were recorded on an Agilent 8453 spectrophotometer (Agilent Technologies, Santa Clara, CA, USA), from solutions in 1 cm quartz cells.

Aqueous solutions of TBT (20  $\mu M$ ) were prepared by diluting the stock solutions, and an increasing concentration (0–80  $\mu M$ ) of Q[*n*] solution was added to free TBT to obtain plot of  $N_{Q[7]}/N_{TBT}$  vs absorbance of TBT.

For the part of detection of  $Ag^+$ : Aqueous solutions of the Q[7]-TBT complex (3:1, 20  $\mu M$ ) were prepared for characterization by UV–vis spectra. Then known quantities of metal ion solutions were added to Q[7]-TBT to obtain the corresponding plot.

## **$^1H$ NMR measurements**

The  $^1H$  NMR spectra were recorded at 25 °C on a Jeol JNM-ECZ400s spectrometer.  $D_2O$  was used as a field-frequency lock and the observed chemical shifts are reported in parts per million (ppm) relative to that for the internal tetramethylsilane (TMS) standard (0.0 ppm).

## **Isothermal titration calorimetry (ITC) measurements**

Thermodynamic parameters and binding constants (K) for the Q[7]-TBT were determined by ITC using a Nano ITC instrument (TA, USA). All solutions were prepared in doubly-distilled water and degassed prior to titration experiments. The heat evolved was recorded at 298.15 K. The heat of dilution was corrected by injecting guest solution (free guest) into an aqueous solution and subtracting the

values from the corresponding values obtained for the host–guest titration. Computer simulations (curve fitting) were performed using Nano ITC analytical software. For Q[7]-TBT, the concentration of Q[7] in the sample cell (1.3 mL) was  $1 \times 10^{-4}$  mol/L. A typical ITC titration was carried out by titrating the TBT solution ( $1 \times 10^{-3}$  mol/L, 10  $\mu$ L aliquots, at 250 s intervals) into Q[7] solution.

#### **Measurement of the limit of detection**

The calculation method used for the limit of detection (DL) was based on the standard derivation of ten measurements in the absence of the guest molecule ( $\sigma$ ) and the slope of the linear calibration curve (K) according to the formula:  $DL = 3\sigma/K$ .

#### **The experimental method of anti-interference experiment**

Other interfering metals (50 equivalents) were separately added to the solution of Q[7]-TBT (3:1, 20  $\mu$ M), then their absorption values were recorded. Subsequently, the detected ion ( $Ag^+$ ) is immediately added into the above mix solution of Q[7]-TBT and interfering metals, then recorded the absorption value once again.

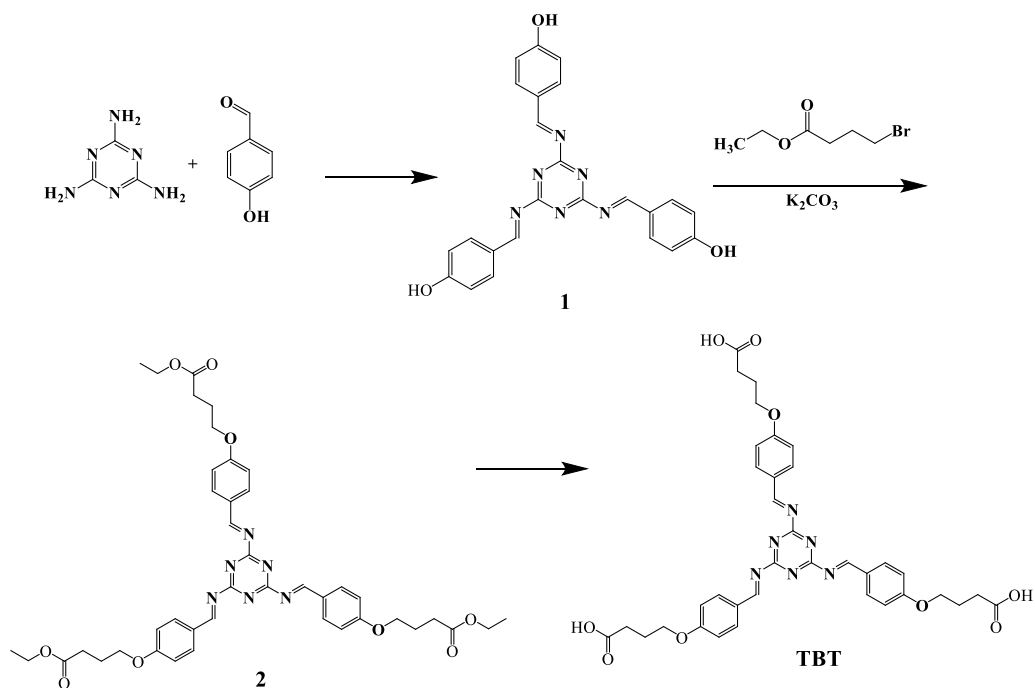

Scheme S1: The synthesis routes of TBT.

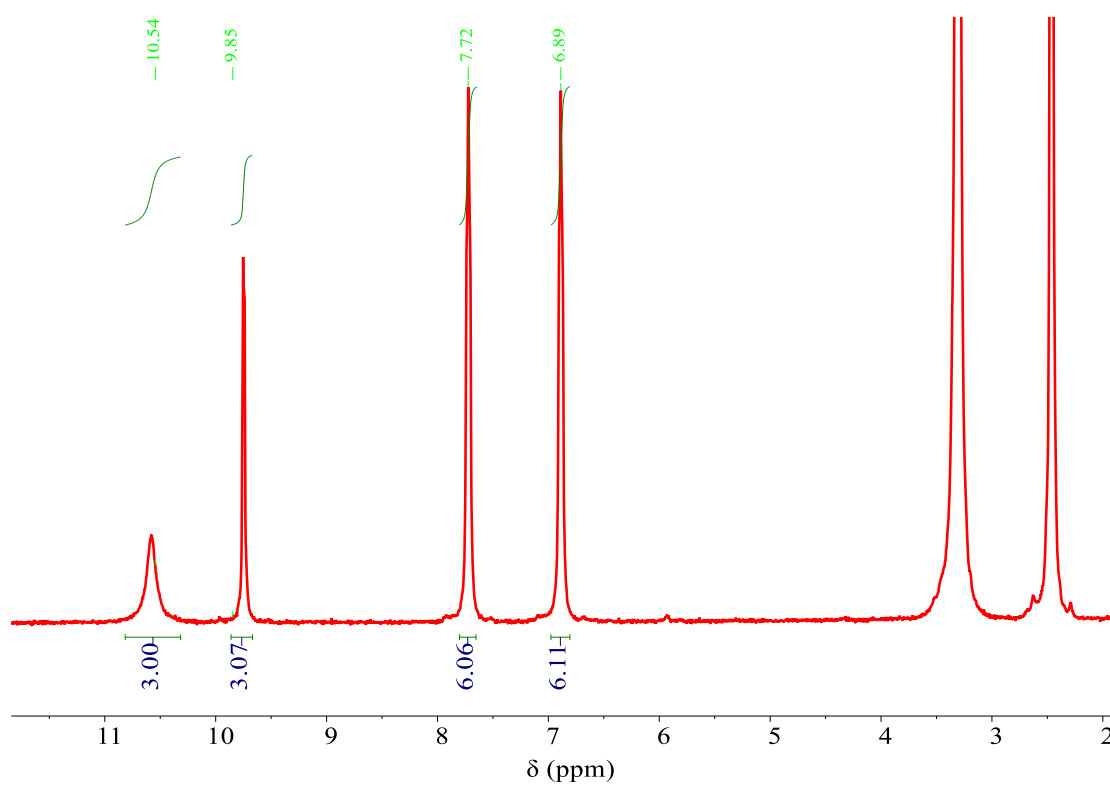

Figure S1: The  $^1H$  NMR of **1**.

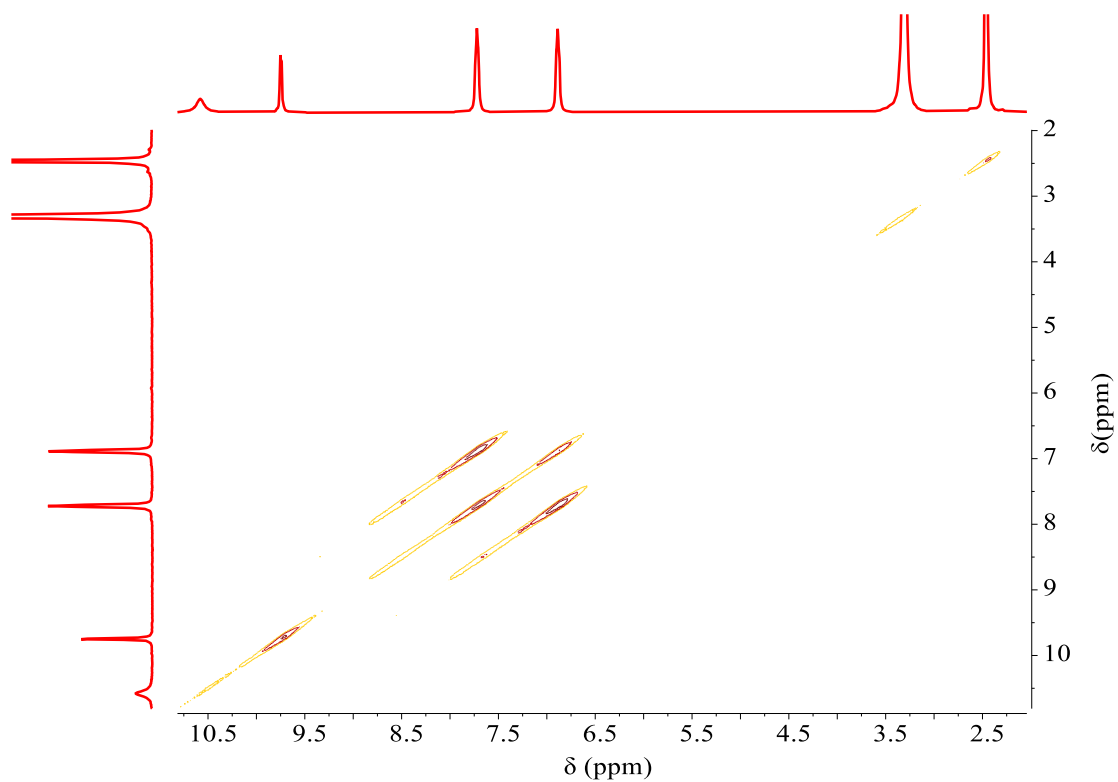

Figure S2: COSY of **1**.

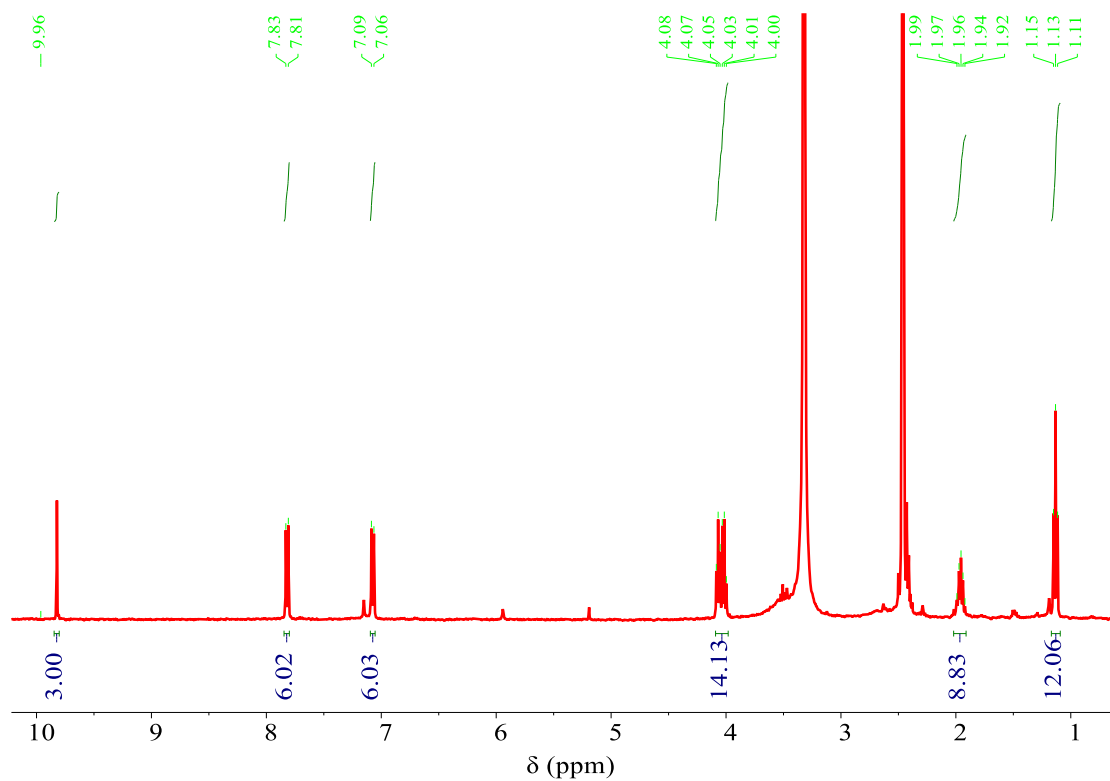

Figure S3: The  $^1\text{H}$  NMR of **2**.

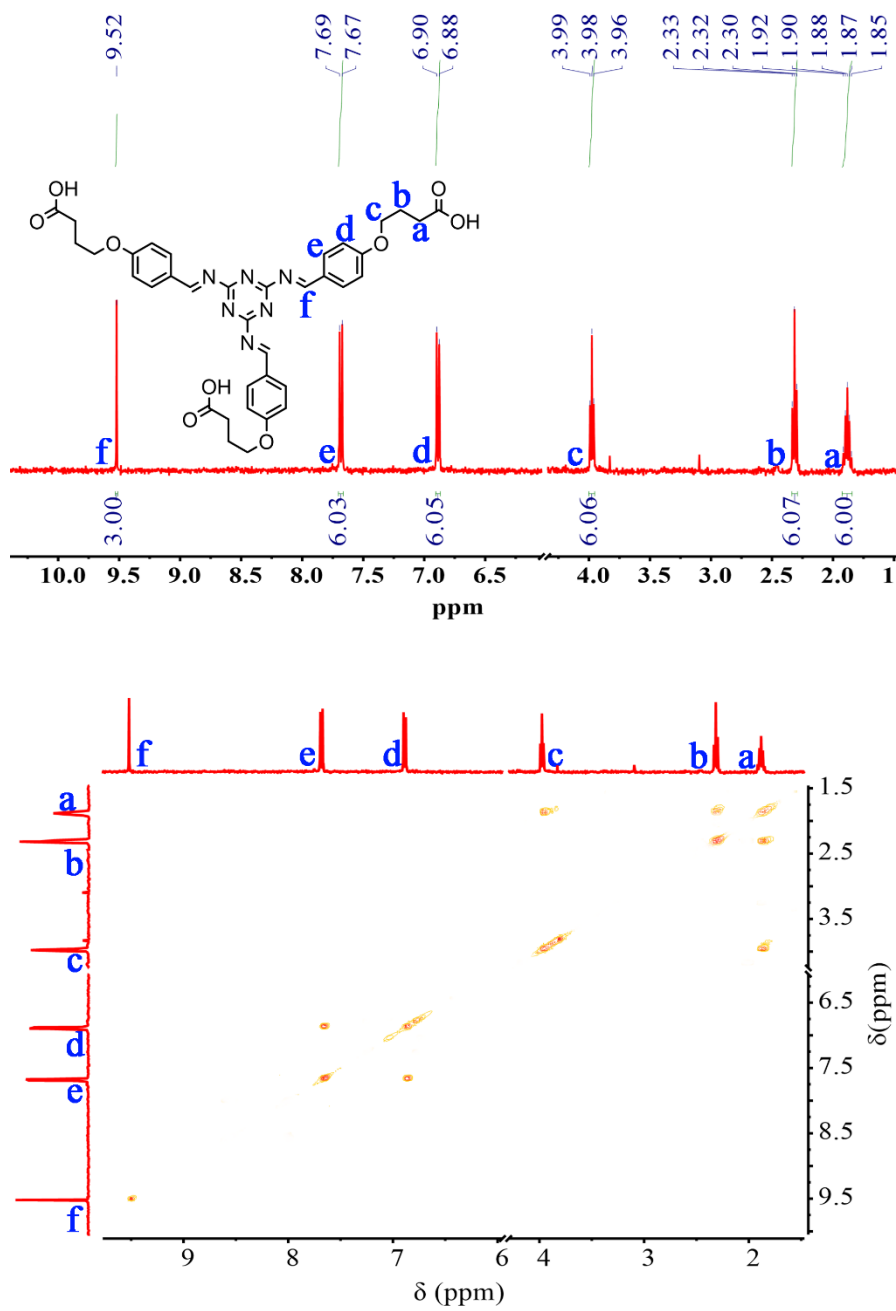

Figure S4: The  $^1\text{H}$  NMR and COSY of **TBT**.

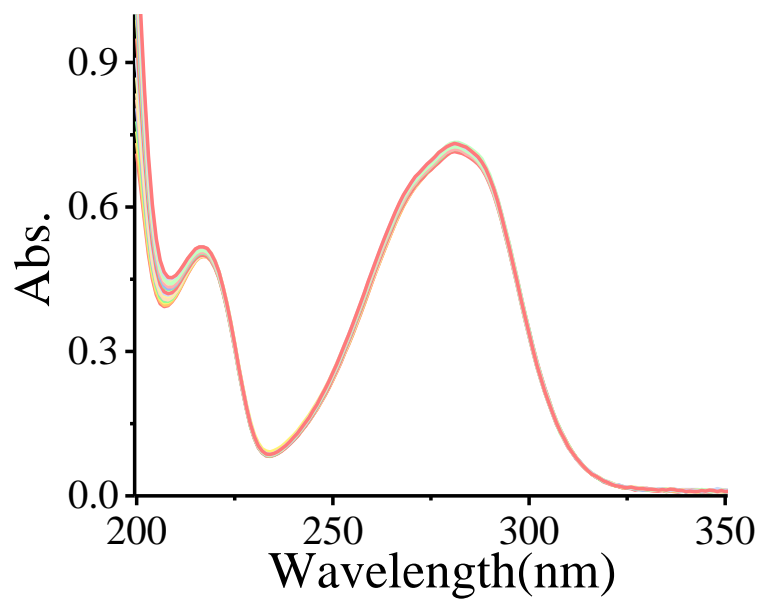

Figure S5: The UV-vis of TBT (20  $\mu\text{M}$ ) towards TMeQ[6].

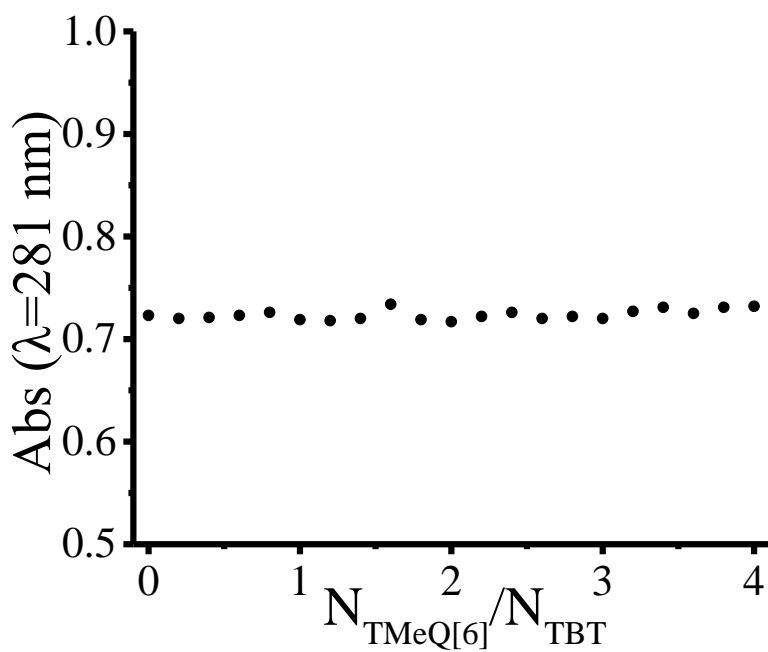

Figure S6: The plot of  $N_{\text{TMeQ[6]}}/N_{\text{TBT}}$  vs abs. at  $\lambda = 286\text{nm}$ .



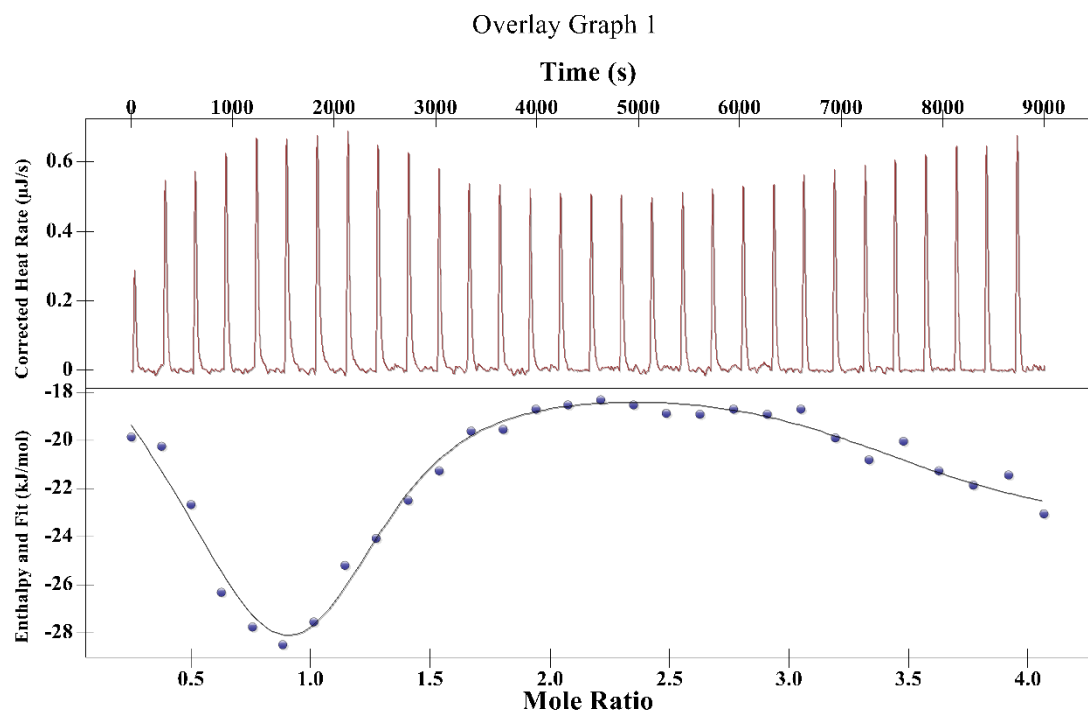

Figure S7: ITC of Q[7] (0.1 M) towards TBT(0.005 M).

Table S1: Data of ITC

|                              |                              |                              |
|------------------------------|------------------------------|------------------------------|
| $K_{a1} (M^{-1})$            | $K_{a2}(M^{-1})$             | $K_{a3}(M^{-1})$             |
| $1.422 \times 10^6$          | 2022                         | 21.55                        |
| $\Delta H_1 (KJ/mol)$        | $\Delta H_2 (KJ/mol)$        | $\Delta H_3 (KJ/mol)$        |
| 62.72                        | -3918                        | -1783                        |
| $\Delta S_1 (J/mol \cdot K)$ | $\Delta S_2 (J/mol \cdot K)$ | $\Delta S_3 (J/mol \cdot K)$ |
| 328.2                        | $-1.308 \times 10^4$         | $-5.954 \times 10^3$         |

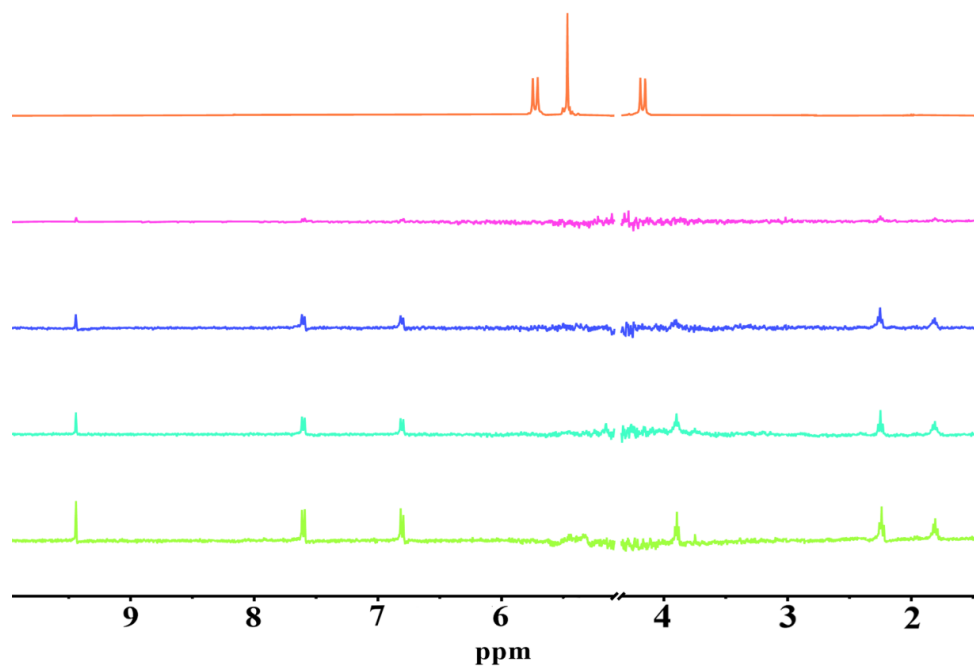

Figure S8: The  $^1\text{H}$  NMR titration of TBT (1 mM) with an increasing amount of Q[8] from 0, 0.5, 1.0 to 2.0 from bottom to top, and free Q[8] (top) in  $\text{D}_2\text{O}$ .

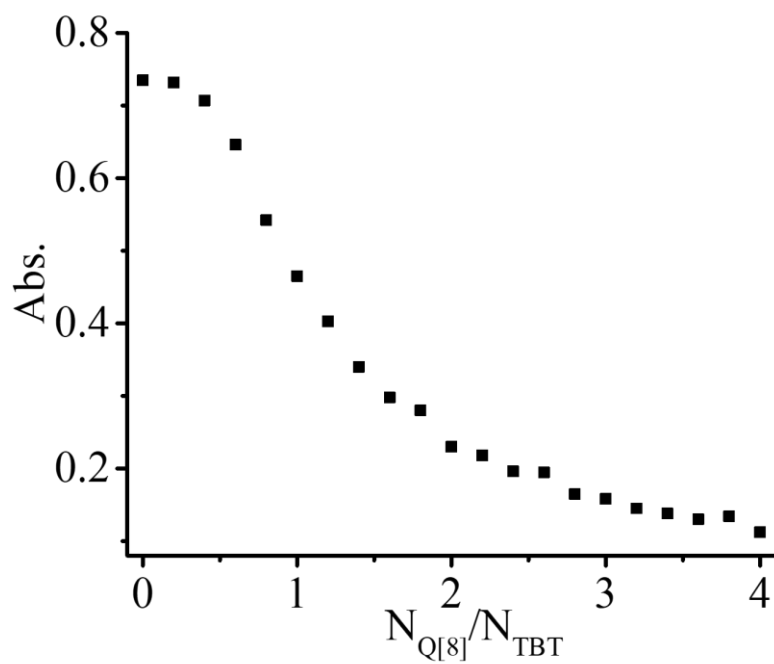

Figure S9: The plot of  $N_{\text{Q}[8]}/N_{\text{TBT}}$  vs abs. at  $\lambda = 286\text{nm}$ .

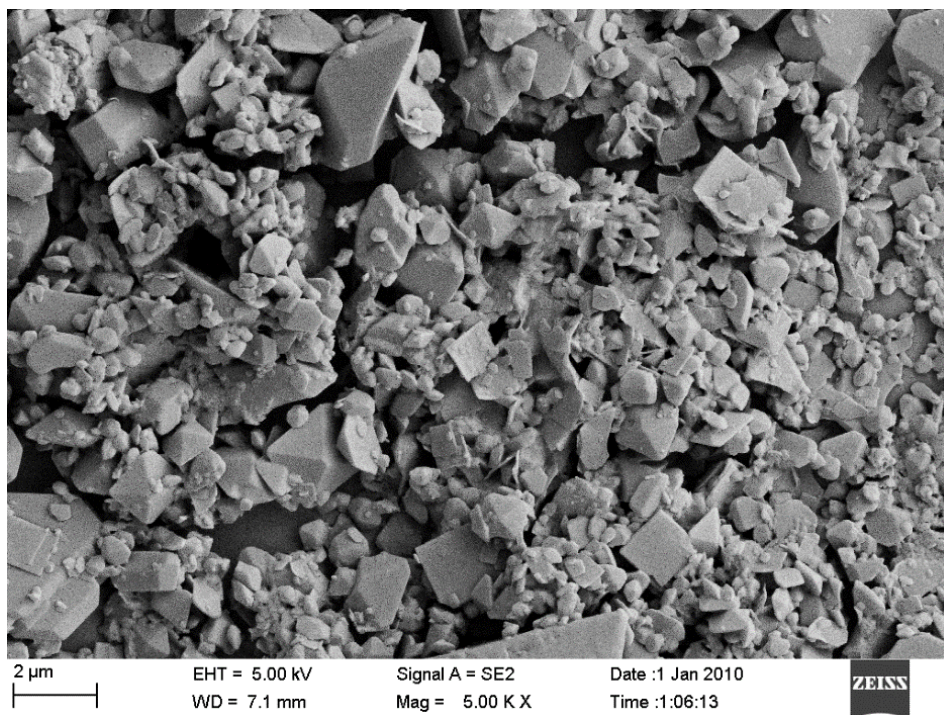

Figure S10: The SEM of Q[8]-TBT (1 mM).

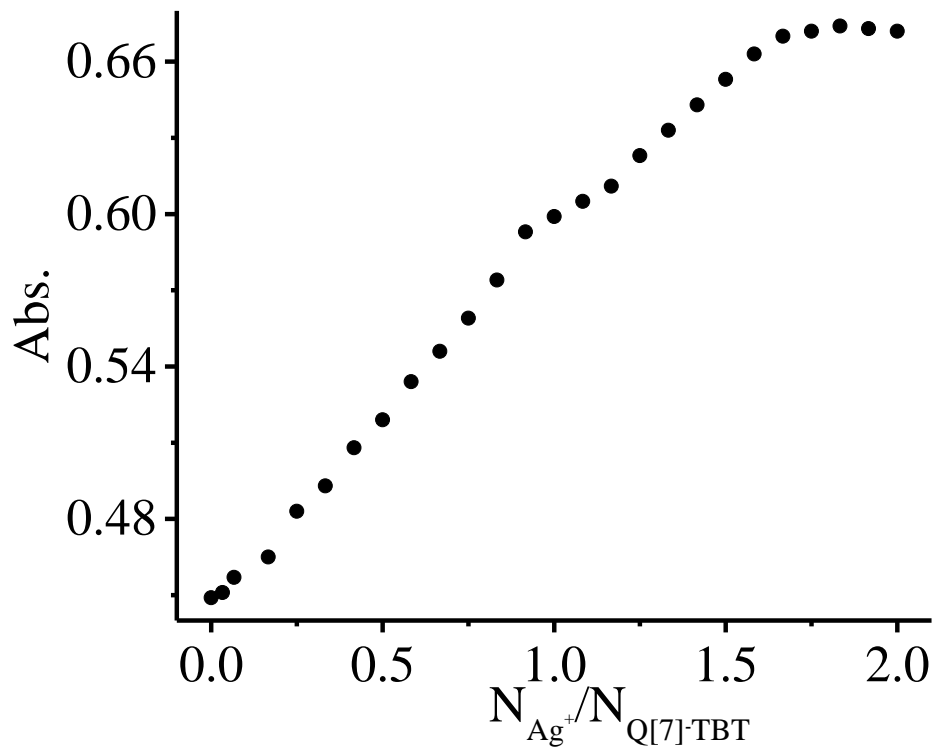

Figure S11: The plot of  $N_{Ag^+}/N_{Q[7]-TBT}$  vs abs. at  $\lambda = 286\text{nm}$ .
